# Supplementary material
Source: Springer Nature journal article supplement (https://www.springermedizin.de/resource/supplementary/12916_2010_403_MOESM1_ESM.pdf/9599876)

### TriVac Model (+/-20% change)

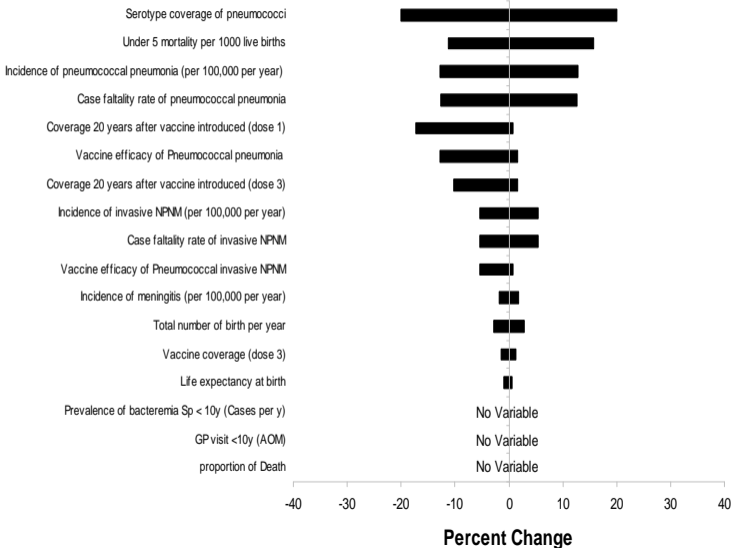

### PneumoADIP Model

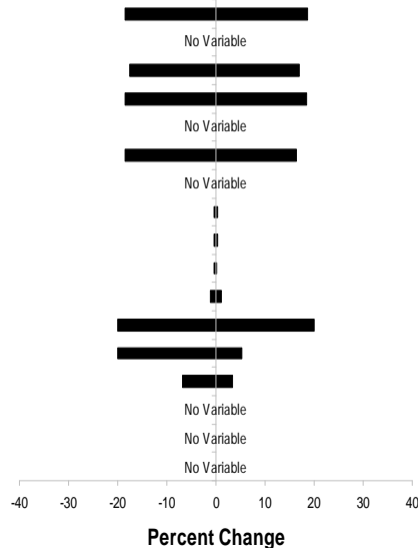

### SUPREMES Model

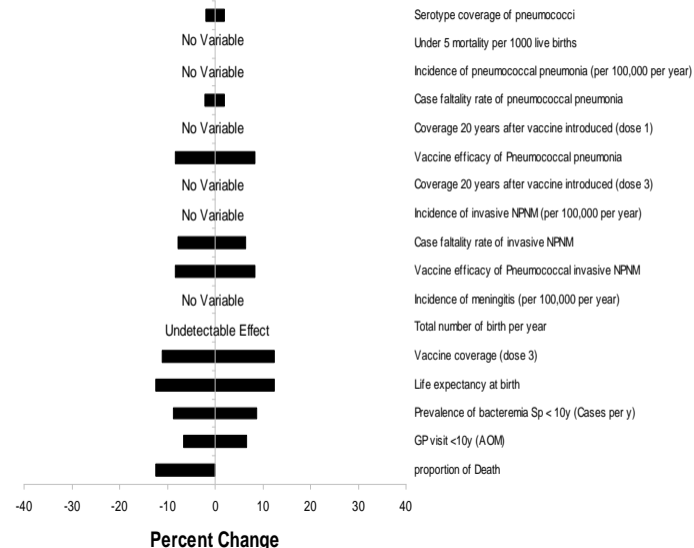

Supplement: MOESM1 [file 9599876]
